# Supplementary material for: Highly phosphorescent perfect green emitting iridium(iii) complex for application in OLEDs
Source: Royal Society of Chemistry journal article supplement (doi:10.1039/b707879j), 2007-01-01
Supplement: b707879j.pdf [file b707879j.pdf]

## Highly Phosphorescent Perfect Green Emitting Iridium III Complex for OLED Application. Supporting information

Henk J. Bolink<sup>\*a</sup>, Eugenio Coronado<sup>a</sup>, Sonsoles Garcia Santamaria<sup>a</sup>, Michele Sessolo<sup>a</sup>, N. Evans,<sup>b</sup> Cedric Klein,<sup>b</sup> E. Baranoff<sup>b</sup>, K. Kalyanasundaram,<sup>b</sup> Michael Graetzel<sup>b</sup> and Md. K. Nazeeruddin<sup>\*b</sup>

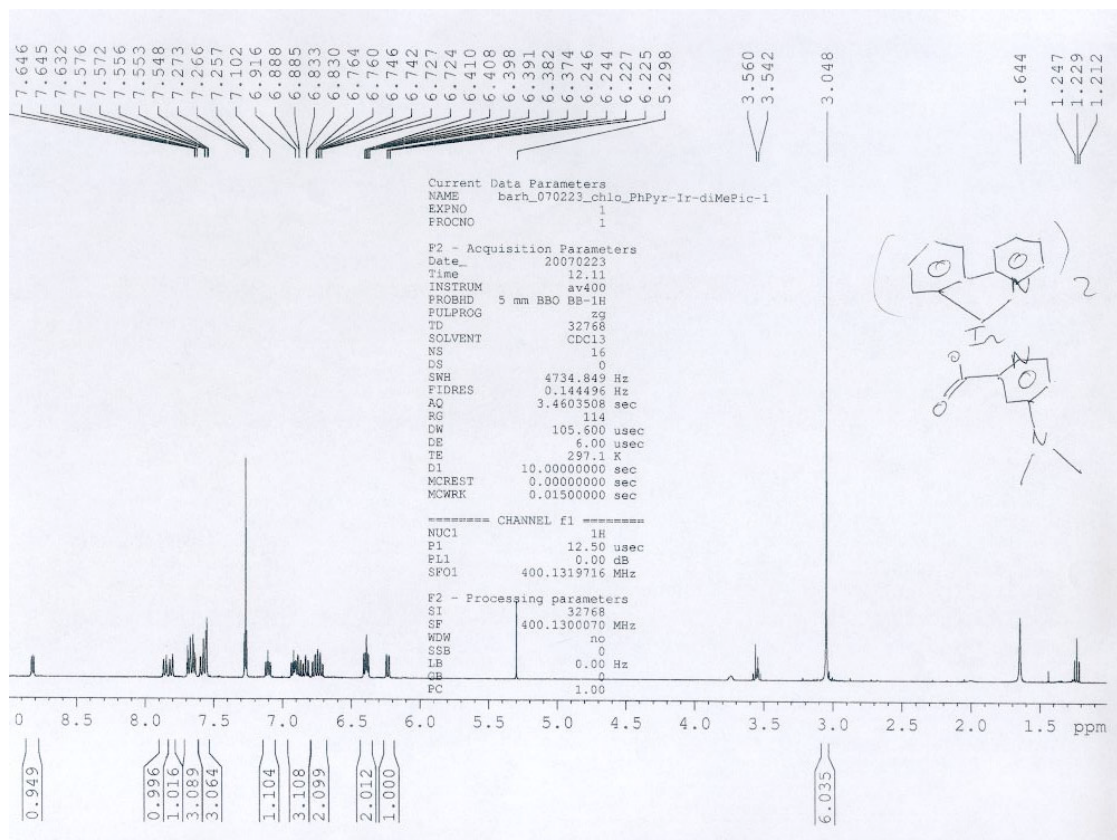

Figure S1a. <sup>1</sup>H NMR spectrum of the N984 complex measured in chloroform.

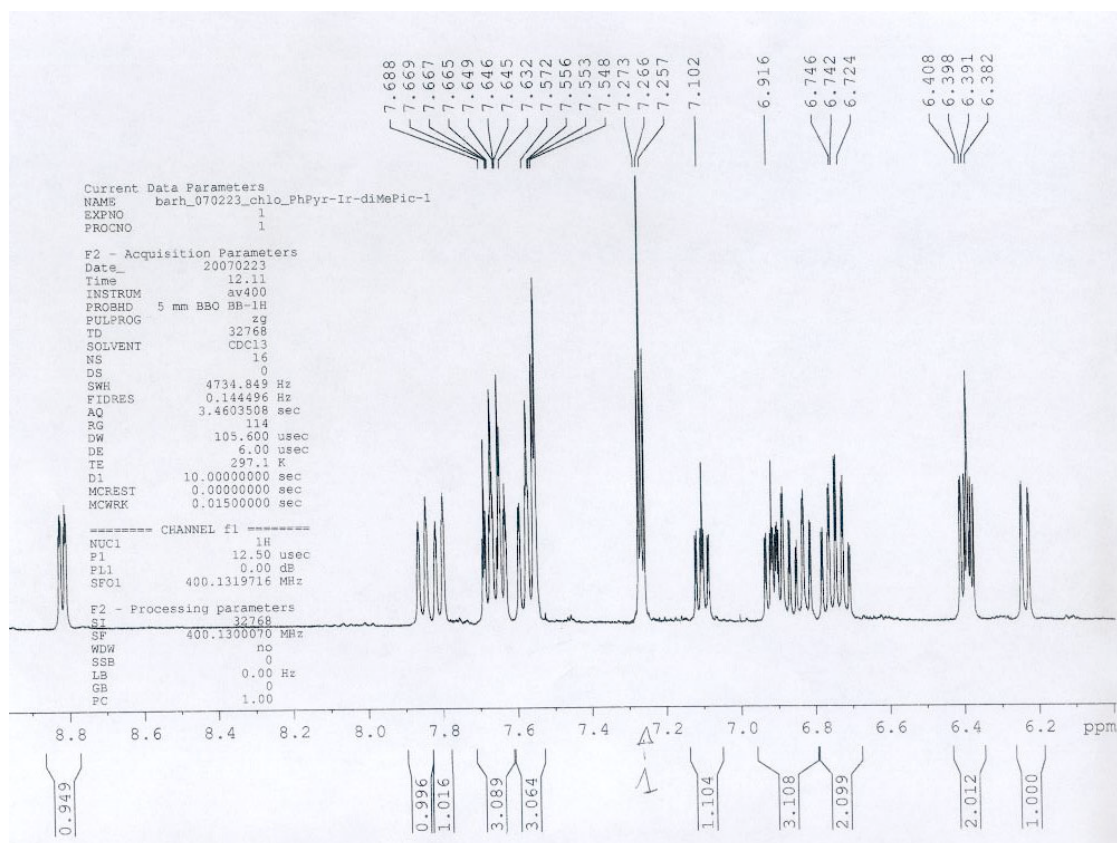

Figure S1b. A portion of  $^1\text{H}$  NMR spectrum of the N984 complex measured in chloroform.

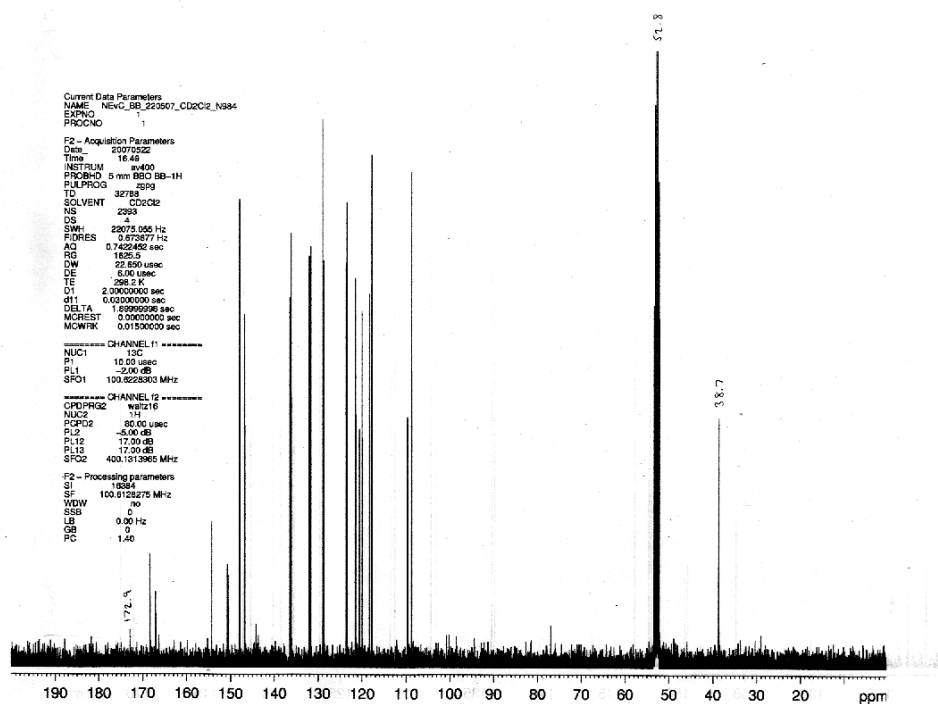

Figure S2a.  $^{13}\text{C}$  NMR spectrum of the N984 complex measured in dichloromethane.

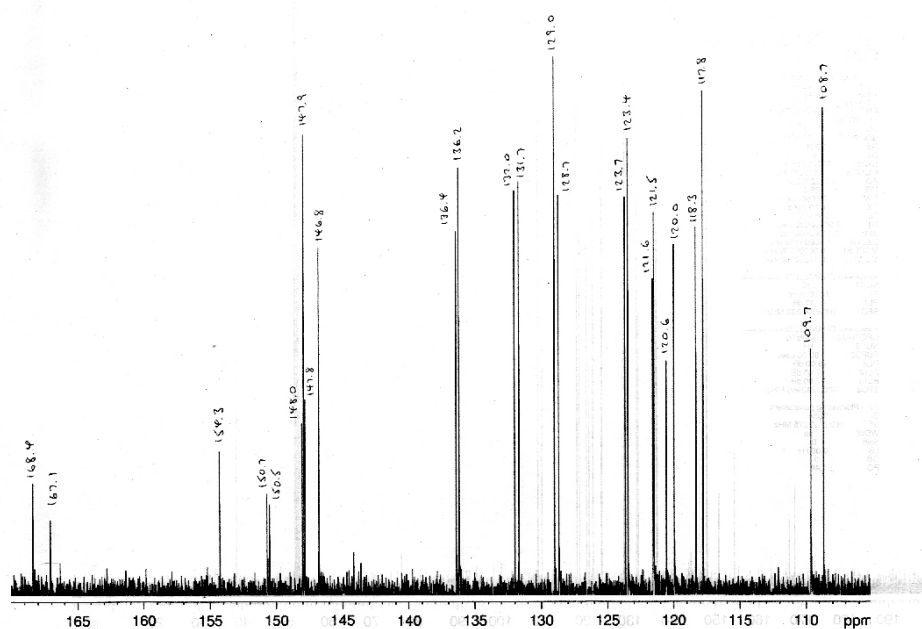

Figure S2b. A portion of  $^{13}\text{C}$  NMR spectrum of the N984 complex measured in dichloromethane.

Elemental analysis:

Calculated for C<sub>30</sub>H<sub>25</sub>IrN<sub>4</sub>O<sub>2</sub>: C, 54.12; H, 3.78; N, 8.42; O, 4.81

Found: C, 54.1; H, 3.99; N, 7.8; O, 4.9

MS (ESI), m/z 667 (M<sup>+</sup>), see Figure 3.

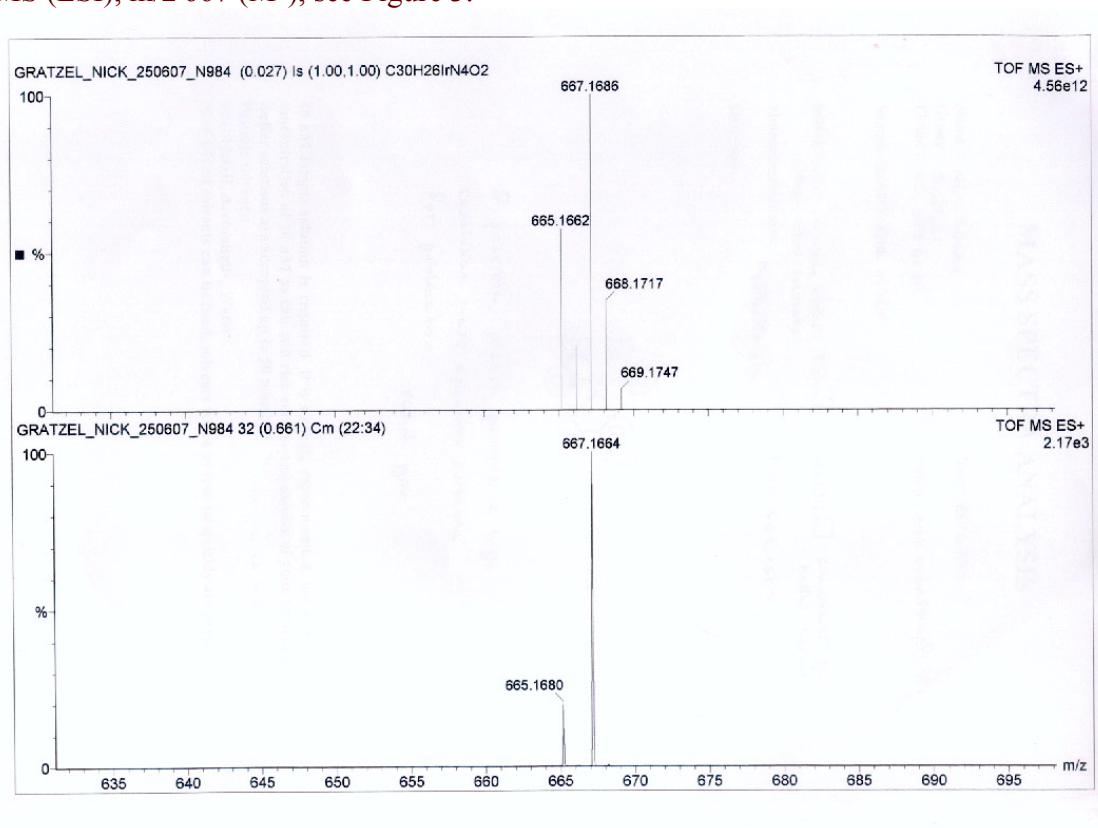

Figure S3. Mass spectra analysis of N984.
